# Supplementary material for: Select but diverse countries are reducing both climate vulnerability and CO2 emissions
Source: Oxford University Press journal article supplement (doi:10.1525/elementa.342), 2019-01-01
Supplement: elementa-7-342-s1.pdf [file elementa-7-342-s1.pdf]

**Table S1.** Indicators for vulnerability measures in ND-GAIN Country Index.

| Sector             | Vulnerability                                                              |                                                     |                                                       |
|--------------------|----------------------------------------------------------------------------|-----------------------------------------------------|-------------------------------------------------------|
|                    | Exposure                                                                   | Sensitivity                                         | Capacity                                              |
| Food               | Projected change of cereal yields                                          | Food import dependency                              | Fertilizer, irrigation, pesticide and tractor use     |
|                    | Projected population change                                                | Rural population                                    | Child malnutrition                                    |
| Water              | Projected change of annual runoff                                          | Fresh water withdrawal rate                         | Access to reliable drinking water                     |
|                    | Projected change of annual groundwater recharge                            | Water dependency ratio                              | Dam capacity                                          |
| Health             | Projected change of deaths from climate induced diseases                   | Slum population                                     | Medical staff                                         |
|                    | Projected change of length of transmission season of vector-borne diseases | Dependency on external resource for health services | Access to improved sanitation facilities.             |
| Ecosystem Services | Projected change of biome distribution                                     | Dependency on natural capital                       | Protected biomes                                      |
|                    | Projected change of marine biodiversity                                    | Ecological footprint                                | Engagement in International environmental conventions |
| Human habitat      | Projected change of warm period                                            | Urban concentration                                 | Quality of trade and transport related infrastructure |
|                    | Projected change of flood hazard                                           | Age dependency ratio                                | Paved roads                                           |
| Infrastructure     | Projected change of hydropower generation capacity                         | Dependency on imported energy                       | Electricity access                                    |
|                    | Projection of Sea Level Rise impacts                                       | Population living under 5 m above the sea           | Disaster preparedness                                 |
